# Supplementary material
Source: publisher figshare collection journal article supplement (https://gsajournals.figshare.com/ndownloader/files/25011728)
Supplement: Supplementary file 1 [file 25011728]

**Table S2. *P*-values of survival determined by the log-rank test for Figure 5**

| **Female** |  | **+/+**  **injured** | **+/*Reldel***  **uninjured** | **+/*Reldel***  **injured** | ***Reldel*/*Reldel***  **uninjured** | ***Reldel*/*Reldel***  **injured** |
| --- | --- | --- | --- | --- | --- | --- |
| **+/+**  **uninjured** | < 0.0001 | 0.0004 | 0.91 | 0.12 | < 0.0001 |
| **+/+**  **injured** |  | < 0.0001 | < 0.0001 | < 0.0001 | 0.43 |
| **+/*Reldel***  **uninjured** |  |  | 0.0004 | 0.07 | < 0.0001 |
| **+/*Reldel***  **injured** |  |  |  | 0.10 | < 0.0001 |
| ***Reldel*/*Reldel***  **uninjured** |  |  |  |  | < 0.0001 |
| **Male** |  | **+/+**  **injured** | **+/*Reldel***  **uninjured** | **+/*Reldel***  **injured** | ***Reldel*/*Reldel***  **uninjured** | ***Reldel*/*Reldel***  **injured** |
| **+/+**  **uninjured** | < 0.0001 | 0.54 | 0.57 | 0.0003 | < 0.0001 |
| **+/+**  **injured** |  | < 0.0001 | < 0.0001 | 0.005 | 0.77 |
| **+/*Reldel***  **uninjured** |  |  | 0.39 | 0.0001 | < 0.0001 |
| **+/*Reldel***  **injured** |  |  |  | 0.014 | < 0.0001 |
| ***Reldel*/*Reldel***  **uninjured** |  |  |  |  | 0.009 |
